# Supplementary material
Source: PubMed Central journal article supplement (PMC4222684)
Supplement: NIHMS486086-supplement-Supplemental_Material.pdf [file NIHMS486086-supplement-Supplemental_Material.pdf]

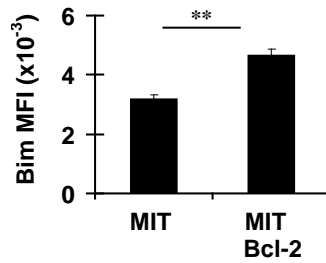

**Supplementary Figure 1: Bcl-2 over-expression increases Bim levels in T cells.**

C57BL/6 mice were injected with 100  $\mu$ g of *Staphylococcus enterotoxin B* (SEB) and sacrificed 24 hrs later. T cells were purified by MACS isolation kit (Miltenyi) according to manufacturer's instructions. Total T cells were either spin-fected with empty vector (MIT) or MIT-Bcl-2 retroviruses. 48 hrs later, T cells were stained with antibodies against Thy1.1, V $\beta$ 8, CD8 and Bim and analyzed by flow cytometry. Bar graphs show Bim MFI for Thy1.1<sup>+</sup> V $\beta$ 8<sup>+</sup> CD8<sup>+</sup> T cells +/- SEM. Bar graphs are representative of three independent experiments.
